# Supplementary material for: Photophysical properties, aggregation-induced fluorescence in nanoaggregates and cell imaging of 2,5-bisaryl 1,3,4-oxadiazoles
Source: Royal Society of Chemistry journal article supplement (doi:10.1039/c4nj02293a), 2015-01-01
Supplement: c4nj02293a1.pdf [file c4nj02293a1.pdf]

*Electronic supplementary information for*

**Photophysical properties, aggregation-induced fluorescence in nanoaggregates and cell imaging of 2,5-bisaryl 1,3,4-oxadiazoles**

Yongchang Jin, Ying Qian\*

Contents

1. Synthetic routes of target chromophores
2. Characterization of target chromophores

## 1. Synthetic routes of target chromophores

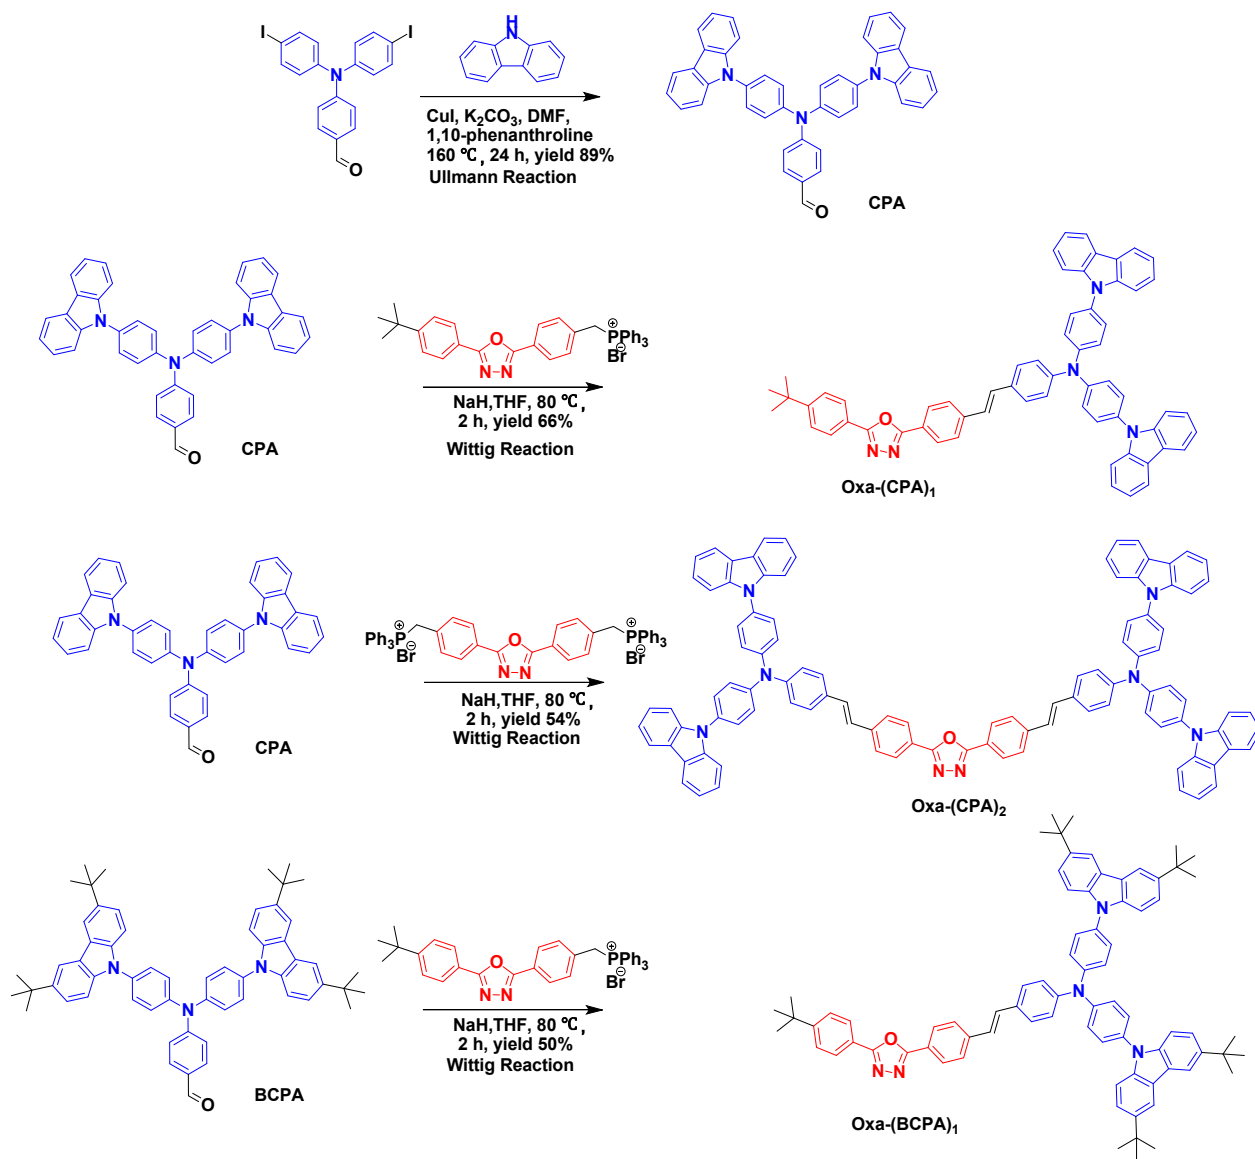

Scheme S1 Synthesis of CPA and target chromophores Oxa-(CPA)<sub>1</sub>, Oxa-(CPA)<sub>2</sub>, and Oxa-(BCPA)<sub>1</sub>.

**Group 1**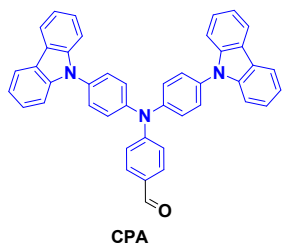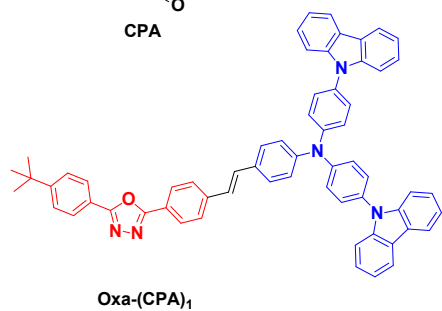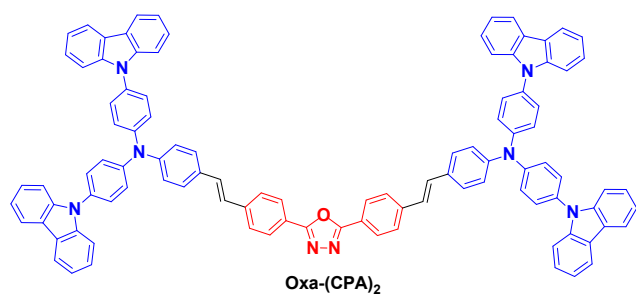**Group 2**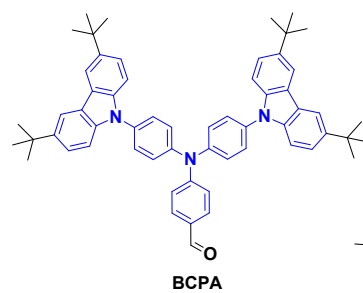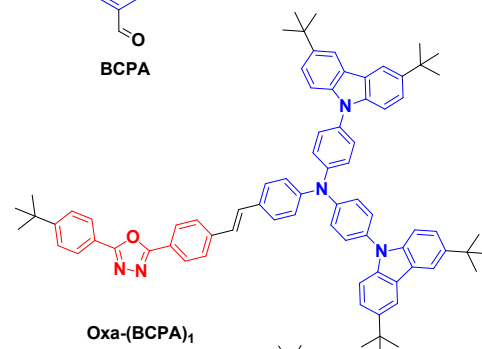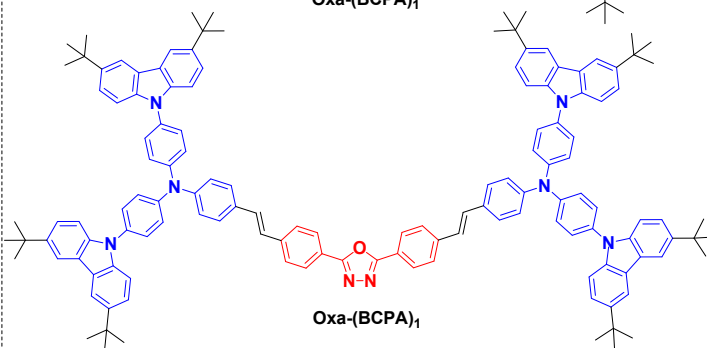

**Scheme S2** CPA/BCPA and four 2,5-bisaryl-1,3,4-oxadiazoles divided into two groups by structures without (group 1) or with (group 2) tert-butyls on the 3,6-positions of carbazoles.

## 2. Characterization of target chromophores

### Oxa-(CPA)<sub>1</sub>.

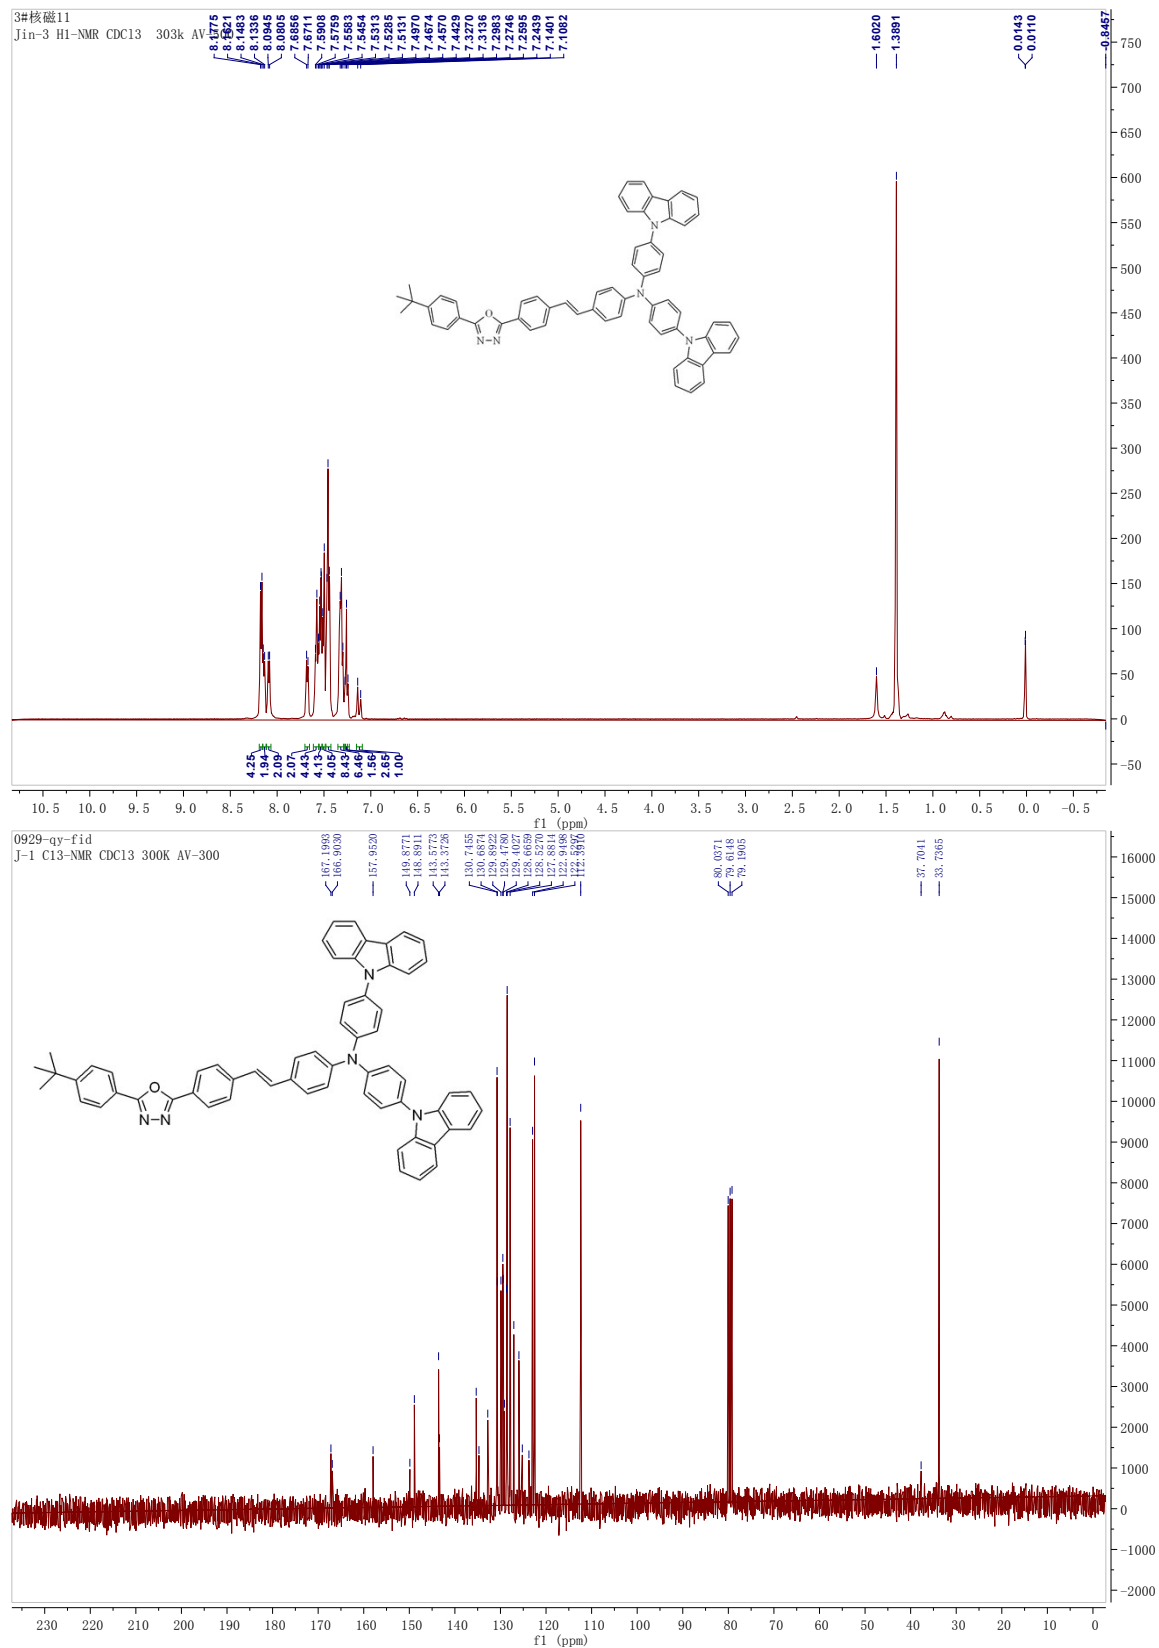

Oxa-(CPA)<sub>2</sub>.

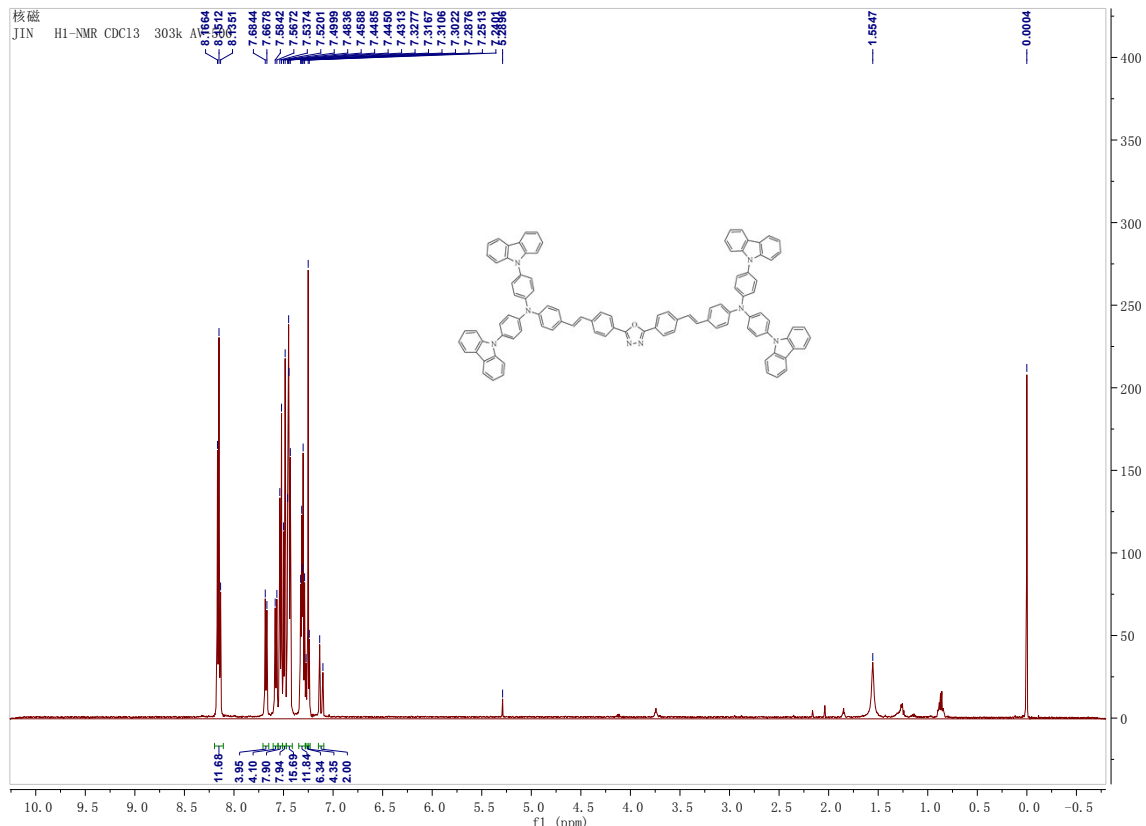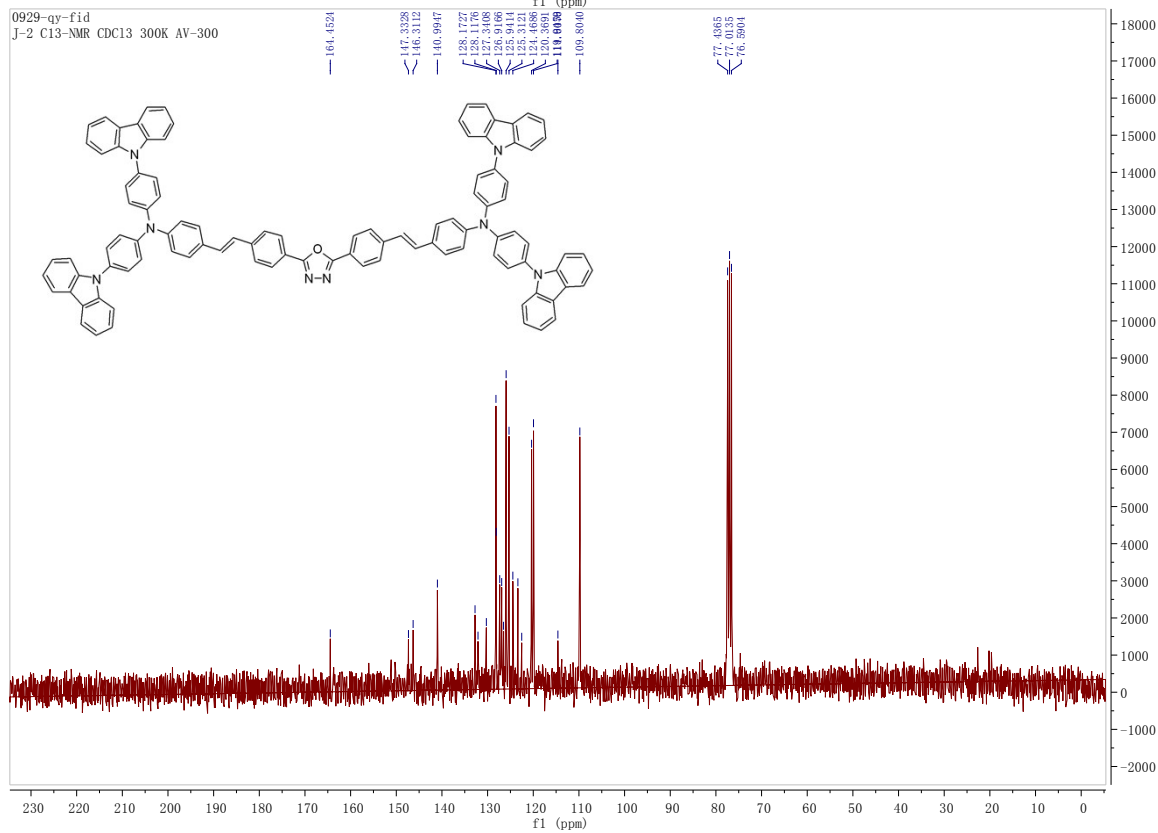

BCPA.

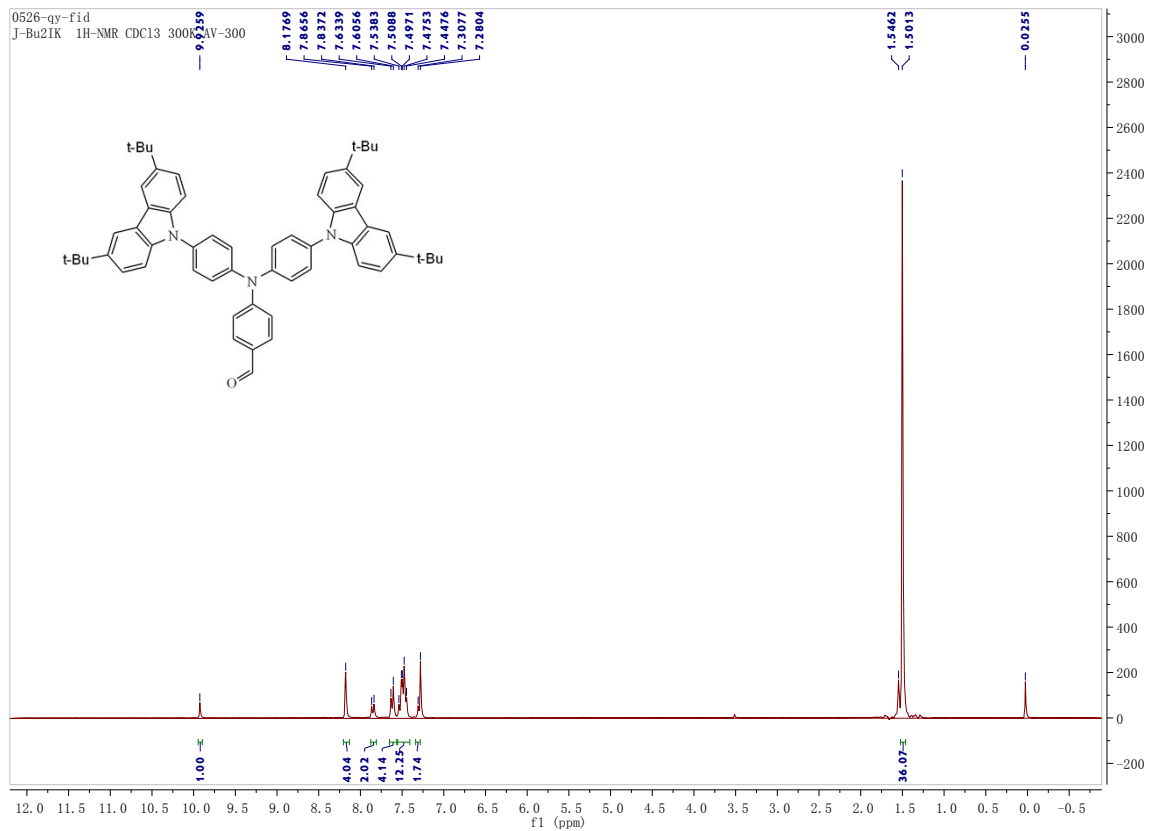

# Oxa-(BCPA)<sub>1</sub>

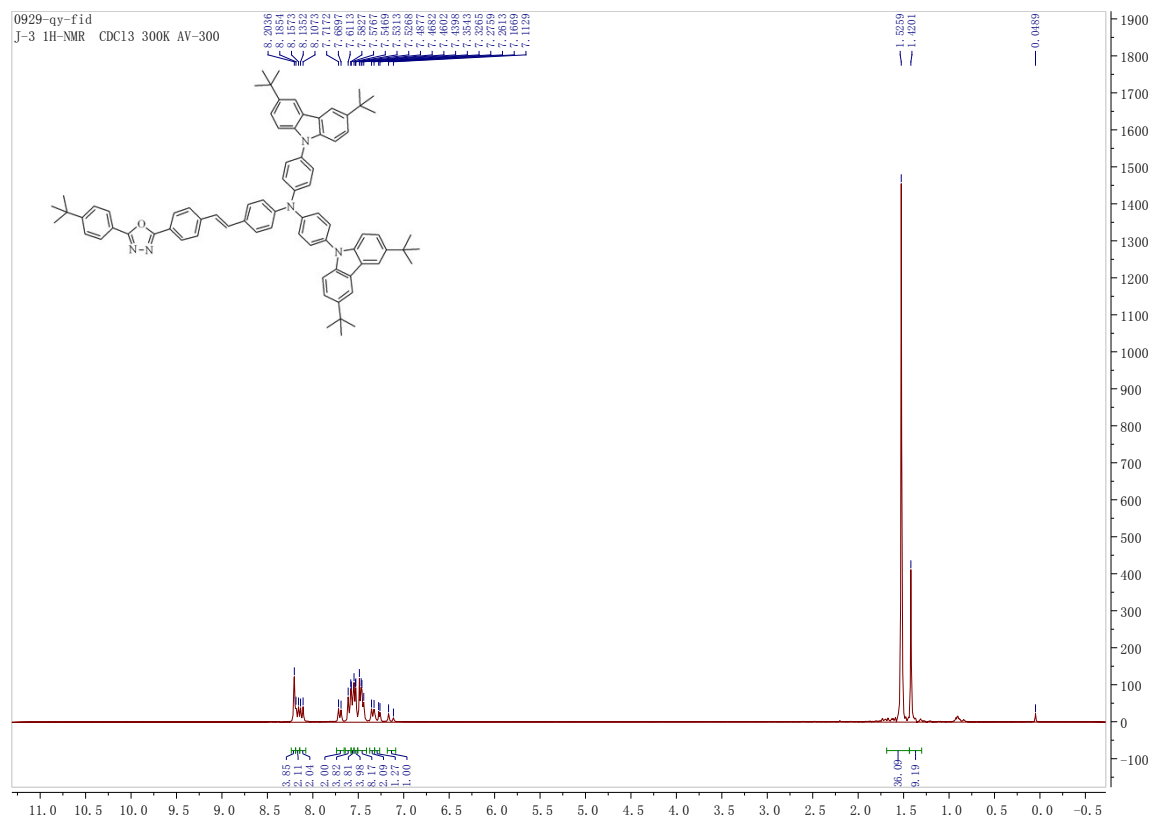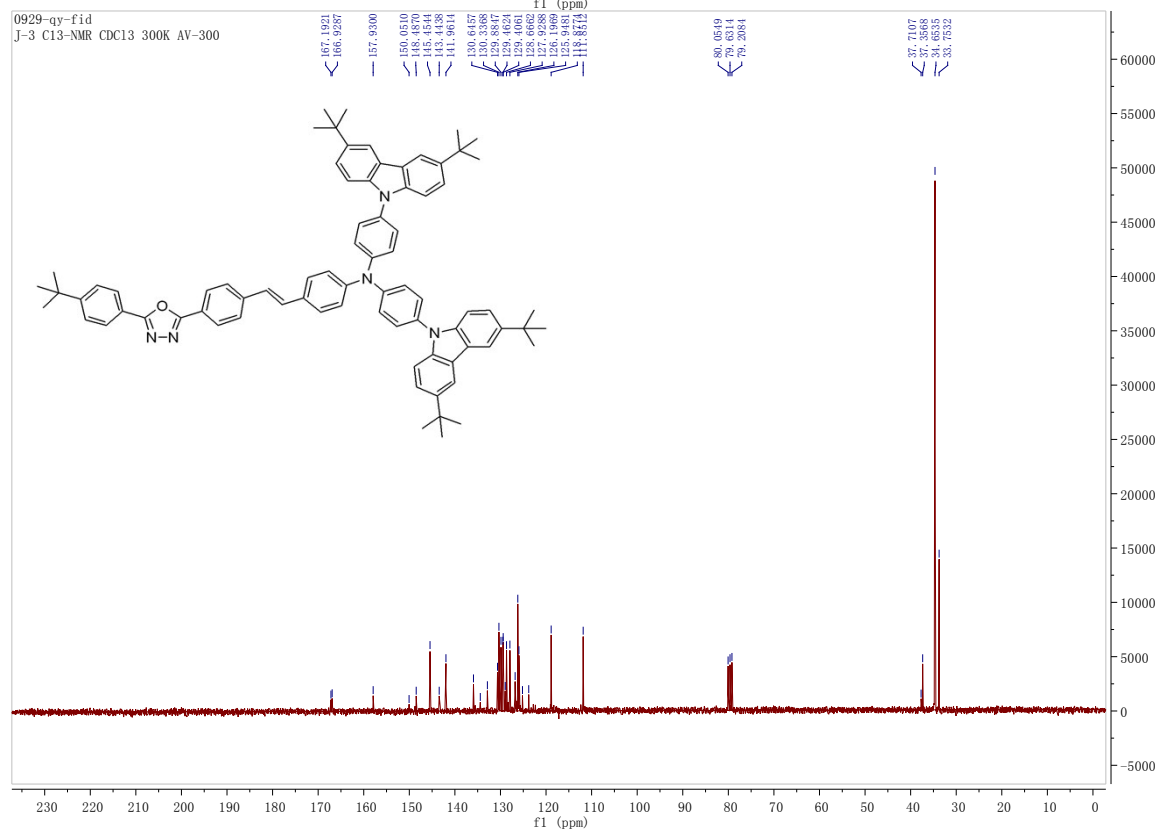

# Oxa-(BCPA)<sub>2</sub>

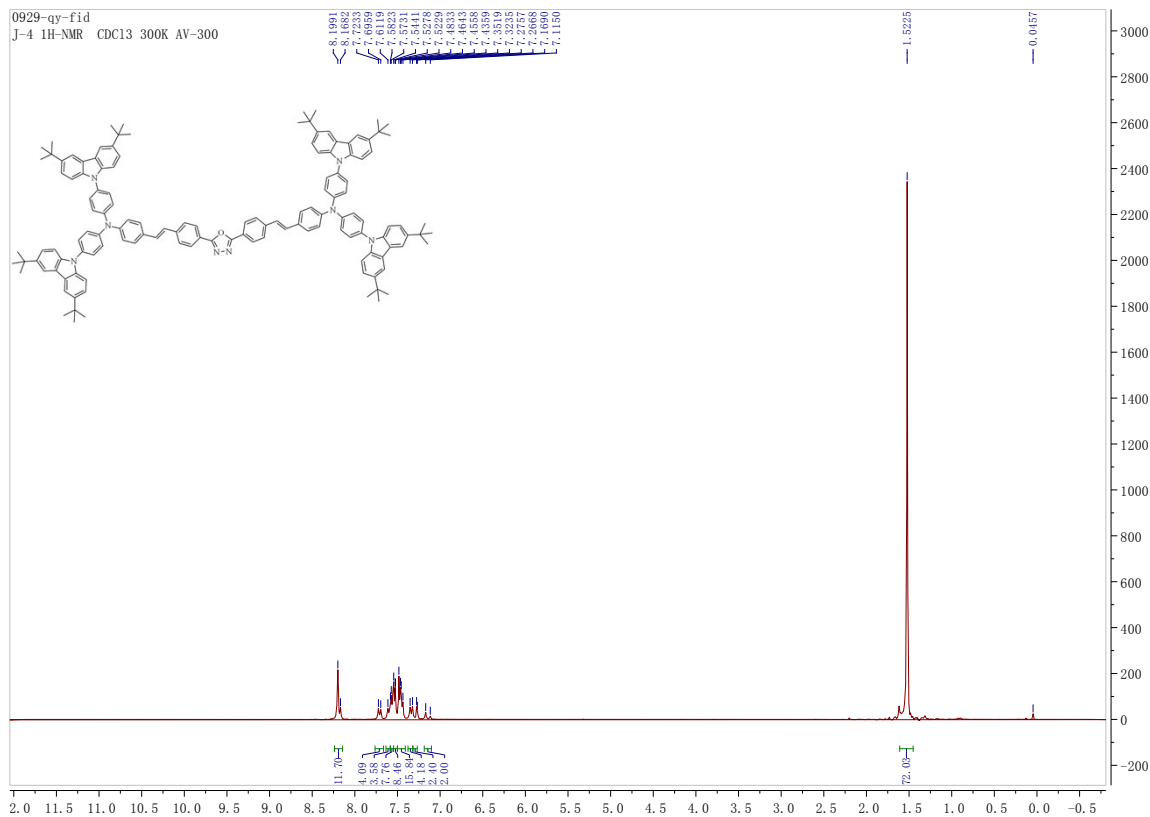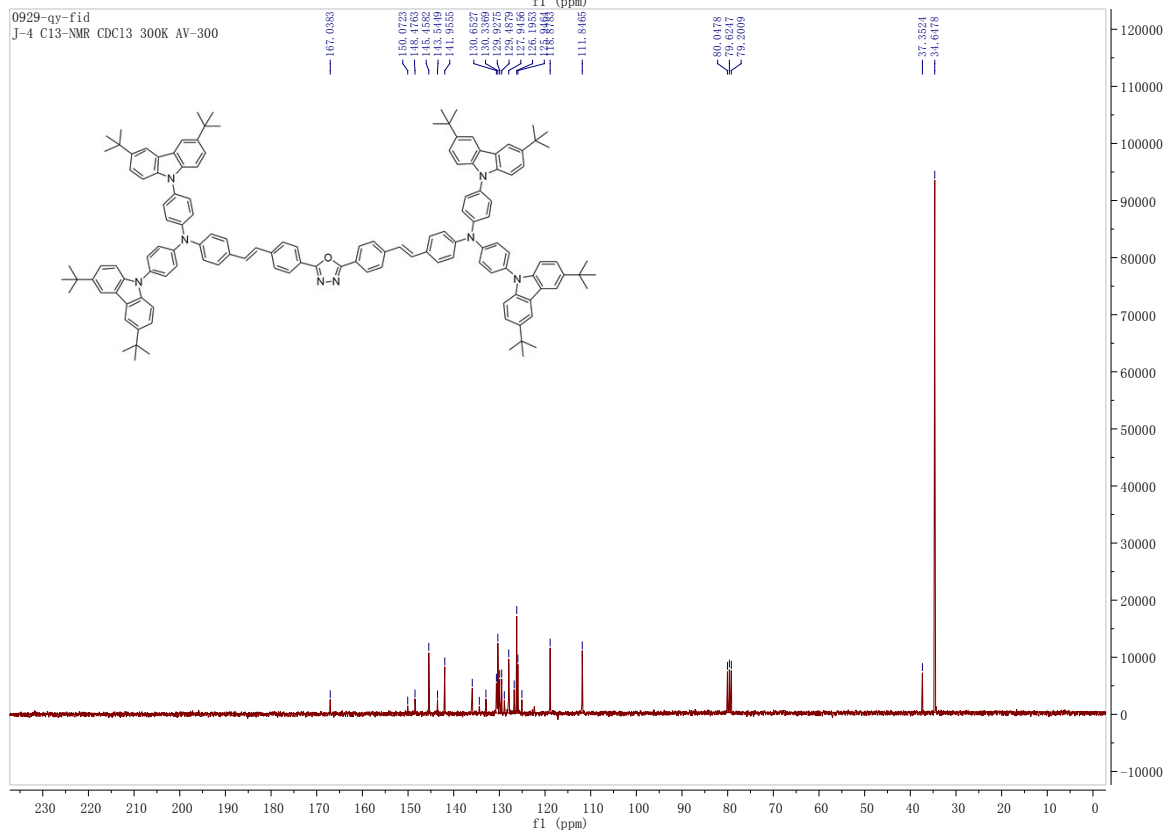



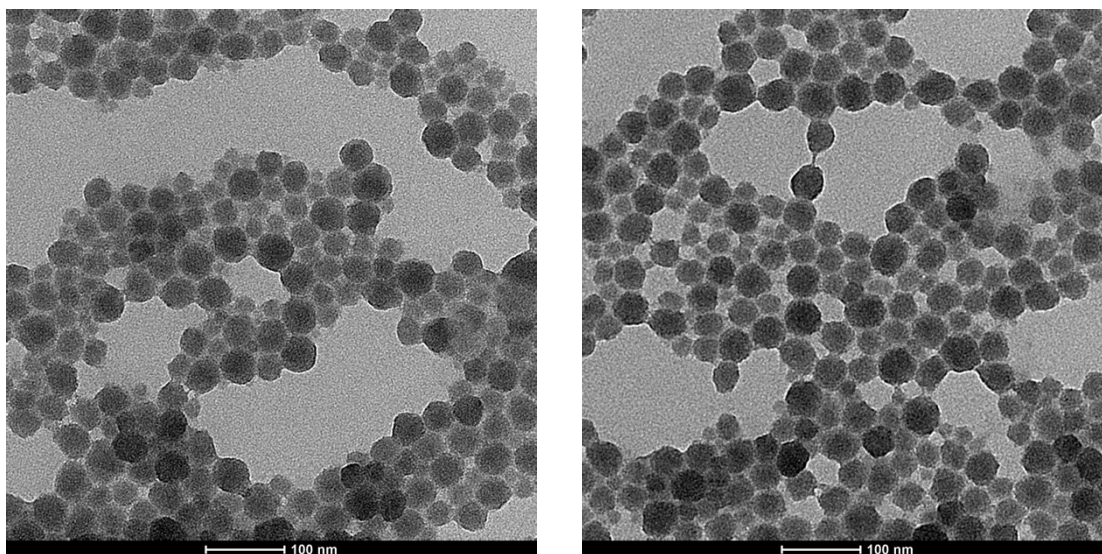

**Fig. S1** TEM pictures of Oxa-(BCPA)<sub>1</sub> (left) and Oxa-(CPA)<sub>2</sub> (right) doped amino-group-functionalized nanoparticles with average diameter of 30 nm.

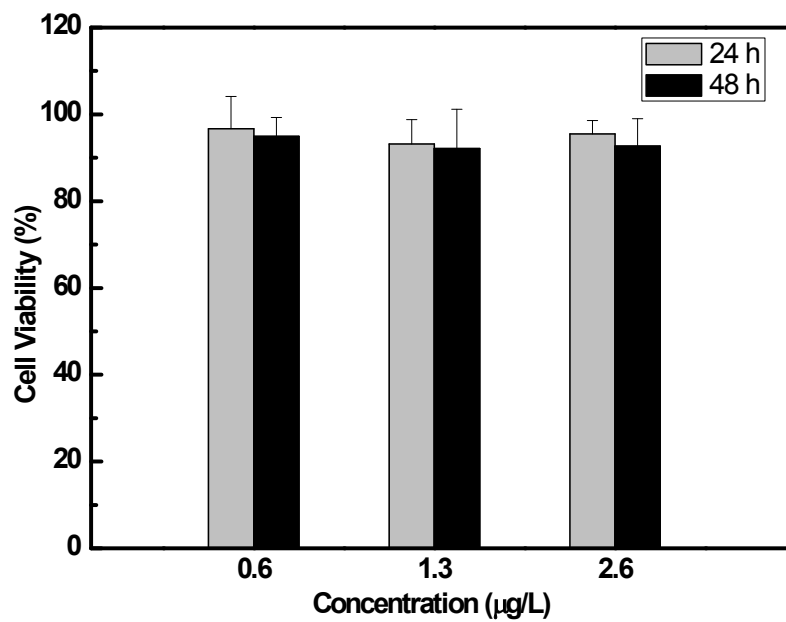

**Fig. S2** Metabolic viability of HeLa cells after incubation with Oxa-(BCPA)<sub>1</sub>-loaded BSA-NPs at various concentrations (counted by the content of pure dyes) for 24 h and 48 h, respectively.
